# Supplementary material for: Skin Delivery of Clec4a Small Hairpin RNA Elicited an Effective Antitumor Response by Enhancing CD8+ Immunity In Vivo
Source: PubMed Central journal article supplement — Mol Ther Nucleic Acids. 2017 Oct 26;9:419–27. doi: 10.1016/j.omtn.2017.10.015 (PMC5701806; doi:10.1016/j.omtn.2017.10.015), 2017-10-26
Supplement: mmc1.pdf [file mmc1.pdf]

OMTN, Volume 9

## Supplemental Information

### **Skin Delivery of Clec4a Small Hairpin RNA**

### **Elicited an Effective Antitumor Response**

### **by Enhancing CD8<sup>+</sup> Immunity *In Vivo***

**Tzu-Yang Weng, Chia-Jung Li, Chung-Yen Li, Yu-Hsuan Hung, Meng-Chi Yen, Yu-Wei Chang, Yu-Hung Chen, Yi-Ling Chen, Hui-Ping Hsu, Jang-Yang Chang, and Ming-Derg Lai**

**A**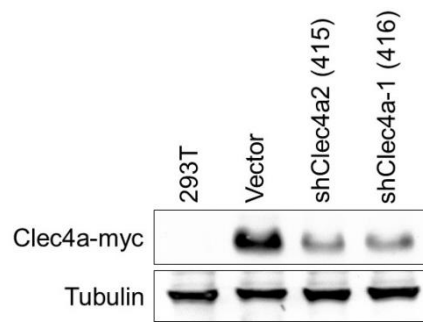**B**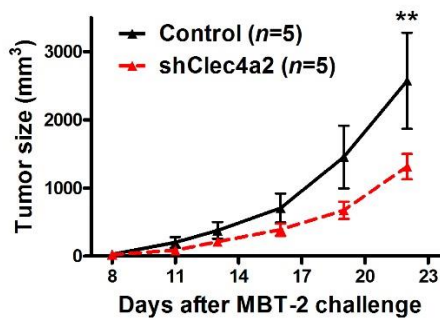**C**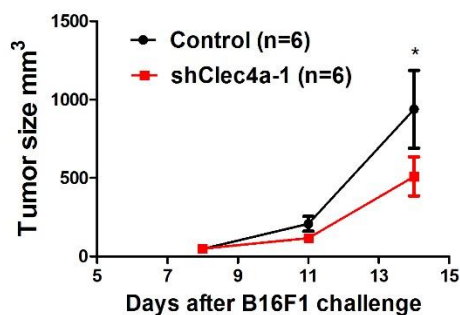

**Supplemental Figure 1.** The knockdown efficacy of shClec4a2 (415), which specifically target the mRNA sequence of Clec4a2 but not Clec4a1 or Clec4b1, was examined in 293T cells co-transfected with Clec4a2-myc. The protein expression of Clec4a2-myc was measured using immunoblotting. 293T, parental control. Vector, pLKO\_AS1+ Clec4a2-myc. shClec4a, Clec4a2 shRNA+ Clec4a2-myc. A pLKO\_AS1 plasmid served as the vector control. Tubulin was used as an internal control. **(B)** Mice bearing MBT-2 tumor cells were treated with shClec4a2 (415) via a gene gun. The tumor size was examined in the C3H/HeN mice on the indicated days (\*\**P* < 0.005 on day 22, pLKO\_AS1 versus shClec4a2). **(C)** Mice received B16F1 tumor cells were treated with shClec4a-1 via a gene gun. The tumor size was examined in the C57BL/6 mice on the indicated days. (\**P* < 0.05 on day 14, pLKO\_AS1 versus shClec4a-1).

Sequences producing significant alignments:

Select: All None Selected: 0

| Alignments                                                                                                                       |           |             |             |         |       |                                |  |
|----------------------------------------------------------------------------------------------------------------------------------|-----------|-------------|-------------|---------|-------|--------------------------------|--|
| Download ▾ GenBank Graphics Distance tree of results                                                                             |           |             |             |         |       |                                |  |
| Description                                                                                                                      | Max score | Total score | Query cover | E value | Ident | Accession                      |  |
| <b>Transcripts</b>                                                                                                               |           |             |             |         |       |                                |  |
| <input type="checkbox"/> PREDICTED: Mus musculus C-type lectin domain family 4, member a2 (Clec4a2), transcript variant X2, mRNA | 42.1      | 42.1        | 100%        | 0.003   | 100%  | <a href="#">XM_011241364.2</a> |  |
| <input type="checkbox"/> PREDICTED: Mus musculus C-type lectin domain family 4, member a2 (Clec4a2), transcript variant X1, mRNA | 42.1      | 42.1        | 100%        | 0.003   | 100%  | <a href="#">XM_006506155.1</a> |  |
| <input type="checkbox"/> Mus musculus C-type lectin domain family 4, member a2 (Clec4a2), transcript variant 1, mRNA             | 42.1      | 42.1        | 100%        | 0.003   | 100%  | <a href="#">NM_001170333.1</a> |  |
| <input type="checkbox"/> Mus musculus C-type lectin domain family 4, member a2 (Clec4a2), transcript variant 3, mRNA             | 42.1      | 42.1        | 100%        | 0.003   | 100%  | <a href="#">NM_001170332.1</a> |  |
| <input type="checkbox"/> Mus musculus C-type lectin domain family 4, member a2 (Clec4a2), transcript variant 2, mRNA             | 42.1      | 42.1        | 100%        | 0.003   | 100%  | <a href="#">NM_011999.4</a>    |  |
| <input type="checkbox"/> PREDICTED: Mus musculus C-type lectin domain family 4, member b1 (Clec4b1), transcript variant X1, mRNA | 34.2      | 34.2        | 100%        | 0.64    | 95%   | <a href="#">XM_006506570.1</a> |  |
| <input type="checkbox"/> Mus musculus C-type lectin domain family 4, member b1 (Clec4b1), transcript variant 2, mRNA             | 34.2      | 34.2        | 100%        | 0.64    | 95%   | <a href="#">NM_027218.3</a>    |  |
| <input type="checkbox"/> Mus musculus C-type lectin domain family 4, member b1 (Clec4b1), transcript variant 1, mRNA             | 34.2      | 34.2        | 100%        | 0.64    | 95%   | <a href="#">NM_001190310.1</a> |  |
| <input type="checkbox"/> PREDICTED: Mus musculus 180kD domain family, member 3 (180kD3), transcript variant X5, mRNA             | 28.2      | 28.2        | 66%         | 40      | 100%  | <a href="#">XM_006528503.3</a> |  |

**Supplemental Figure 2.** The BLAST result of shClec4a-2. The target sequence of shClec4a-2 was searched by using Standard Nucleotide BLAST on NCBI. The mouse genomic and transcript databases were used. The black frame represented the prediction of the shClec4a-2 target sequence to identify 100% of the sequence of the Clec4a2 mRNA. The red frame represented the prediction of the shClec4a-2 target sequence to identify 100% of the sequence of the Clec4b1 mRNA.
